# Supplementary material for: Functional Characterization and Phenotyping of Protoplasts on a Microfluidics-Based Flow Cytometry
Source: MDPI journal article supplement (doi:10.3390/bios12090688), 2022-08-26
Supplement: s1 [file s1]

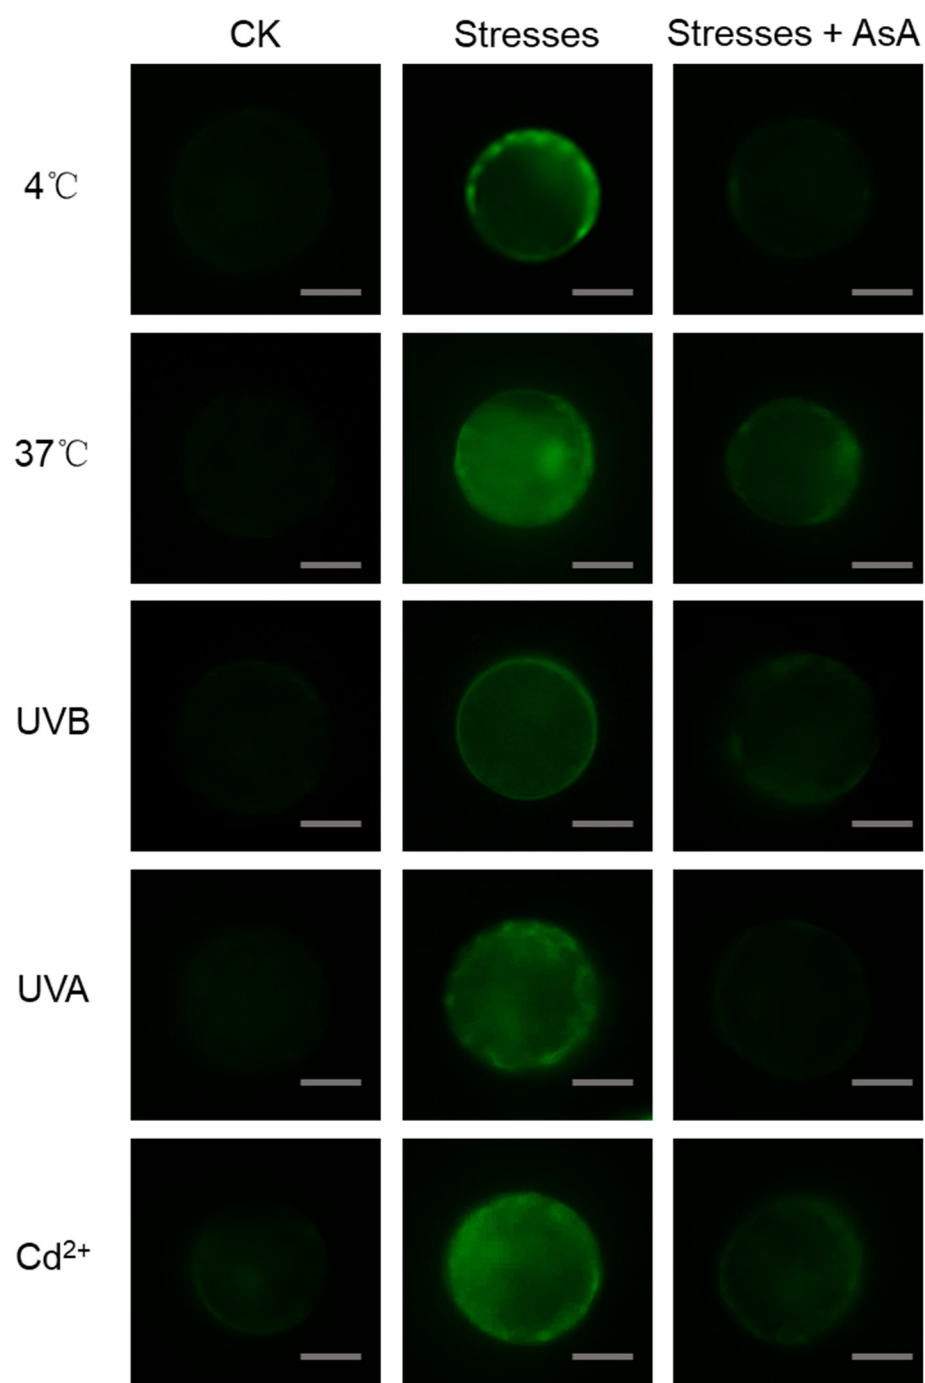

Figure S1. Fluorescence images of Arabidopsis protoplasts with and without ASA under different external stress treatments (with a scale bar of 25um).
